# Supplementary material
Source: PubMed Central journal article supplement (PMC9133068)
Supplement: NIHMS1770911-supplement-Supplemental_Publication_Material_1.pdf [file NIHMS1770911-supplement-Supplemental_Publication_Material_1.pdf]

## **Supplementary Material**

### **Intraventricular Hemorrhage Expansion in the CLEAR III Trial: A Post Hoc Exploratory Analysis**

#### **Table of Contents:**

Supplementary Figure I..... Page 2

Supplementary Table I..... Page 3

**Supplemental Figure I:** Box plot showing a change in ICH volume (Y-axis) plotted against the increasing quintiles of change in IVH volume (X-axis). Note: Quintile 5 represents the maximum change in IVH volume from baseline to stability CT scans. Abbreviations: CT, computed tomography; ICH, intracerebral hemorrhage; IVH, intraventricular hemorrhage.

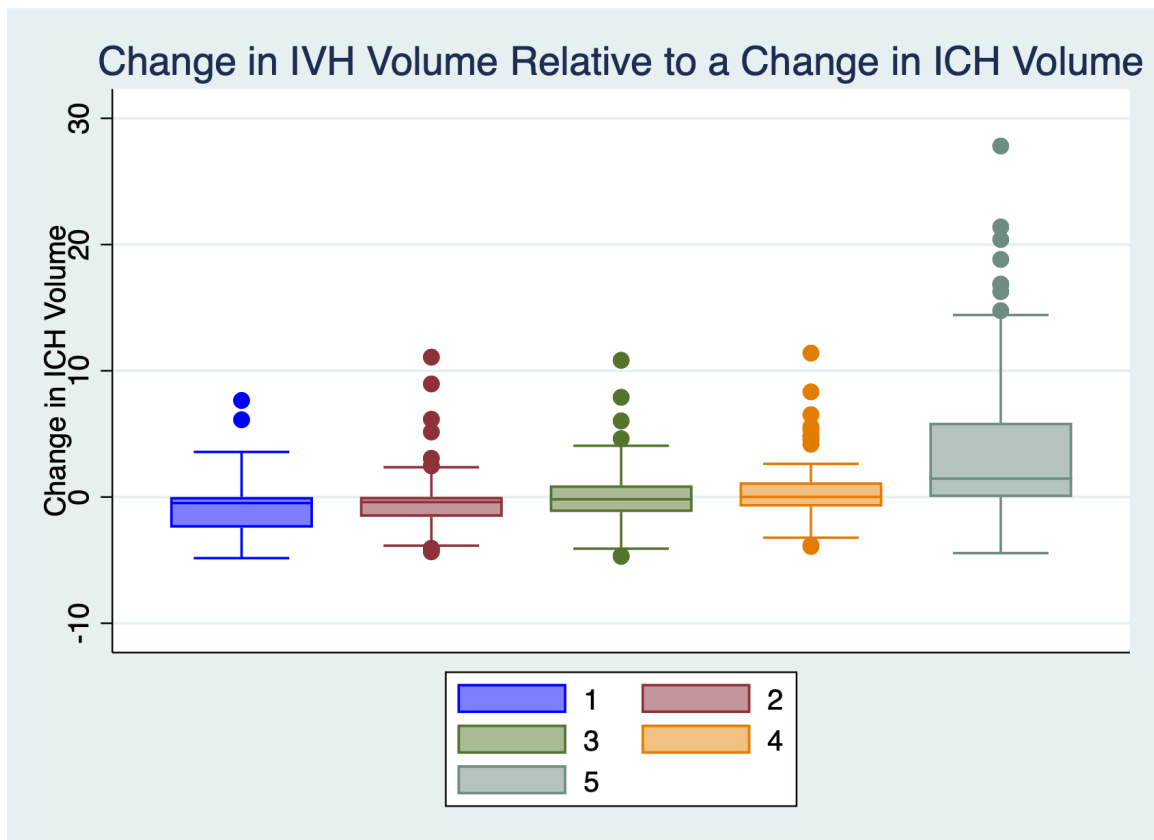

**Supplemental Table I: Logistic Regression Analyses Showing Factors Associated with Intraventricular Hemorrhage Expansion.**

| <b>Factors</b>                                                       | <b>OR (95% CI)</b> | <b>P value</b>   |
|----------------------------------------------------------------------|--------------------|------------------|
| Age, per year increase                                               | 1.01 (0.98-1.03)   | 0.30             |
| Female                                                               | 1.28 (0.83-2.01)   | 0.27             |
| Black race                                                           | 0.87 (0.52-1.46)   | 0.59             |
| Baseline ICH volume, per 1 mL increase                               | 1.04 (1.01-1.08)   | 0.06             |
| ICH expansion                                                        | 6.69 (3.93-11.37)  | <b>&lt;0.001</b> |
| Prior anticoagulant therapy                                          | 1.51 (0.71-3.18)   | 0.28             |
| Hypertension                                                         | 1.26 (0.72-2.20)   | 0.41             |
| Time from baseline CT scan to stability CT scan, per 1-hour increase | 0.98 (0.97-1.01)   | 0.07             |
| Thalamic location                                                    | 1.67 (1.01-2.78)   | <b>0.049</b>     |

**Abbreviations:** CI: confidence interval; ICH, intracerebral hemorrhage; OR: odds ratio; mL, milliliter; CT: computed tomography  
P value <0.05 was considered significant
